# Supplementary material for: Bio-inspired heterogeneous sensitization of bimetal oxides on SnO2 scaffolds for unparalleled formaldehyde detection
Source: Royal Society of Chemistry journal article supplement (doi:10.1039/c8cc09882d), 2019-01-01
Supplement: c8cc09882d1.pdf [file c8cc09882d1.pdf]

## Supporting Information

# Bio-Inspired Heterogeneous Sensitization of Bimetal Oxides on SnO<sub>2</sub> Scaffold for Unparalleled Formaldehyde Detection

Yong Jin Jeong, Dong-Ha Kim, Ji-Soo Jang, Joon-Young Kang, Rhee Hyun Kim, and Il-Doo Kim\*

Department of Materials Science and Engineering, Korea Advanced Institute of Science and Technology (KAIST), 291 Daehak-ro, Yuseong-gu, Daejeon 34141, Korea

\*Corresponding author e-mail: idkim@kaist.ac.kr

## Table of Contents

- Experimental details
- Fig. S1 SEM images of control samples
- Fig. S2 EDS elemental mapping images of SnO<sub>2</sub> FITs
- Fig. S3 EDS elemental mapping images of SnO<sub>2</sub> FITs
- Fig. S4 XRD analysis of samples
- Fig. S5 XPS analysis of NiO/Fe<sub>2</sub>O<sub>3</sub>-SnO<sub>2</sub> FITs
- Fig. S6 Optimization of amount of catalysts and operating temperature
- Fig. S7 Selective sensing properties of SnO<sub>2</sub> FITs.
- Fig. S8 Response variation of SnO<sub>2</sub> NFs and SnO<sub>2</sub> FITs
- Fig. S9 0.05–1 ppm HCHO response ( $R_{\text{air}}/R_{\text{gas}}$ ) of recently reported sensors and in this work.
- Table. S1 ICP-OES test results of NiO/Fe<sub>2</sub>O<sub>3</sub>-SnO<sub>2</sub> FITs
- Table. S2 Sensing properties of recently reported SMOs-based formaldehyde gas sensors

## Experimental details

**Materials.** Polyvinylpyrrolidone (PVP,  $M_w \sim 1,300,000 \text{ g mol}^{-1}$ ), chitosan (medium molecular weight,  $(\text{C}_6\text{H}_{11}\text{NO}_4)_n$ ), and sodium borohydride ( $\text{NaBH}_4$ ,  $\geq 96\%$ ) were purchased from Aldrich. Nickel(II) chloride hexahydrate ( $\text{NiCl}_2 \cdot 6\text{H}_2\text{O}$ ,  $\geq 98\%$ ), tin(II) chloride dihydrate ( $\text{SnCl}_2 \cdot 2\text{H}_2\text{O}$ , 98%), *N,N*-dimethylformamide (DMF, 99.8%), and iron(III) chloride hexahydrate ( $\text{FeCl}_3 \cdot 6\text{H}_2\text{O}$ , 97%) were purchased from Sigma-Aldrich. Acetic acid (glacial, 99.8%) was purchased from SAMCHUN chemical. All materials were used without further purification.

**Synthesis of  $\text{SnO}_2$  NFs and  $\text{SnO}_2$  FITs.** We synthesized  $\text{SnO}_2$  NFs and  $\text{SnO}_2$  FITs as control samples. To synthesize  $\text{SnO}_2$  NFs, we dissolved 0.35 g of PVP and 0.25 g of Sn precursor in 2 mL of DMF and stirred at 300 rpm for 5 h at room temperature. Then, we carried out electrospinning of the solution by using a feeding rate of 0.1 mL/min and a voltage of 15 kV. The distance from needle (23 gauge) to the collector was fixed at 20 cm. Subsequently, we conducted heat treatment of as-spun Sn precursor/PVP NFs at 600 °C for 1 h at a ramping rate of 5 °C/min to decompose PVP and formation of  $\text{SnO}_2$  NFs. On the other hand,  $\text{SnO}_2$  FITs was obtained by electrospinning the solution with a reduced amount of PVP (0.3 g) and 0.25 g of Sn precursor in 2 mL of DMF, followed by subsequent calcination at 600 °C for 1 h.

**Synthesis of  $\text{NiO-SnO}_2$  FITs.**  $\text{NiO-SnO}_2$  FITs were synthesized as a reference sample. First, we prepared 1 w/v chitosan (CS) solution by adding 20 mg of CS in 2 mL of DI water (1% of acetic acid) and stirring the solution at 300 rpm for 12 h to completely dissolve CS at room temperature. Then, we mixed 32.4 mg of  $\text{NiCl}_2 \cdot 6\text{H}_2\text{O}$  in the CS solution by stirring at 300 rpm for 2 h to form CS-Ni ions dissolved solution. Subsequently, 0.2 mL of separately prepared

aqueous  $\text{NaBH}_4$  solution (0.1 M) was added to the CS-Ni ions dissolved solution to reduce the Ni ions to Ni nanoparticles, leading to CS-Ni<sup>0</sup> complex solution. Then, we incorporated 10  $\mu\text{L}$  of the CS-Ni<sup>0</sup> complex solution into the electrospinning solution, which had the same composition as that of pristine  $\text{SnO}_2$  FITs. Finally, electrospinning and subsequent heat treatment were conducted to obtain NiO- $\text{SnO}_2$  FITs at the same conditions as for the synthesis of pristine  $\text{SnO}_2$  FITs.

***Synthesis of NiO/Fe<sub>2</sub>O<sub>3</sub>-SnO<sub>2</sub> FITs.*** The CS-Ni<sup>0</sup>Fe<sup>0</sup> complex solution was prepared as a template for heterogeneous sensitization of NiO/Fe<sub>2</sub>O<sub>3</sub> on  $\text{SnO}_2$  FITs. First, 16.2 mg of  $\text{NiCl}_2 \cdot 6\text{H}_2\text{O}$  and 19.36 mg of  $\text{FeCl}_3 \cdot 6\text{H}_2\text{O}$  were dispersed in 2 mL of 1 w/v chitosan aqueous solution with 1% acetic acid. We then conducted room temperature stirring of the solution at 300 rpm for 2 h to form CS-NiFe ions solution. Subsequently, 0.2 mL of aqueous  $\text{NaBH}_4$  solution (0.1 M) was added to the CS-NiFe ions solution to reduce the ions to metallic nanoparticles, resulting in the formation of CS-Ni<sup>0</sup>Fe<sup>0</sup> complex solution. Then, 10, 20, 30, and 40  $\mu\text{L}$  of CS-Ni<sup>0</sup>Fe<sup>0</sup> complex solution were directly dispersed in separate electrospinning solutions of the same composition as that used for the synthesis of pristine  $\text{SnO}_2$  FITs. Finally, electrospinning and subsequent calcination were carried out at the same condition as for pristine  $\text{SnO}_2$  FITs, leading to NiO/Fe<sub>2</sub>O<sub>3</sub>- $\text{SnO}_2$  FITs with Ni/Fe wt % of 0.024, 0.048, 0.072, and 0.096.

***Sensor fabrication and sensing test.*** We prepared alumina substrates with an area and thickness of 2.5 mm  $\times$  2.5 mm and 0.2 mm, respectively. Two parallel gold electrodes were patterned on the front side of the substrate to measure the resistance of sensing materials. In addition, the back side of the substrate was integrated with a platinum heater through which

the operating temperature was controlled. We dispersed 4 mg of each samples (SnO<sub>2</sub> NFs, SnO<sub>2</sub> FITs, NiO–SnO<sub>2</sub> FITs, and NiO/Fe<sub>2</sub>O<sub>3</sub>–SnO<sub>2</sub> FITs) in 0.2 mL of ethanol and then the obtained paste was drop-coated on the substrates. By using a homemade gas sensing measurement system, the sensing performance of the sensors was investigated. Prior to injection of specific gas molecules to the sensors, a fresh air (30% RH) was injected into the sensing chamber for 3 h to stabilize the base resistance of the sensors. Then, we injected the analyte gas in the concentration range of 0.2–5 ppm for 10 min, followed by a flow of fresh air for 10 min to recover the sensors to base resistances. The base resistances in air ( $R_{\text{air}}$ ) and in analyte gas ( $R_{\text{gas}}$ ) were converted into the response ( $R = R_{\text{air}}/R_{\text{gas}}$ ) of the sensors. In addition, the response time was calculated as the time taken to decrease the base resistance of the sensor in air by 90% upon exposure to target gas.

**Characterization.** The morphologies and characteristics of the materials were confirmed by the field emission scanning electron microscopy (Nova230, FEI) and field emission transmission electron microscopy (Tecnai G2 F30 S-TWIN, FEI). To analyze the crystal structures of the samples, the high-resolution powder X-ray diffractometer (D/MAX-2500, Rigaku) with Cu K $\alpha$ 1 radiation ( $\lambda = 1.5418 \text{ \AA}$ ) was used. The X-ray photoelectron spectroscopy (K-alpha, Thermo VG Scientific) was utilized to investigate the chemical binding states of the materials.

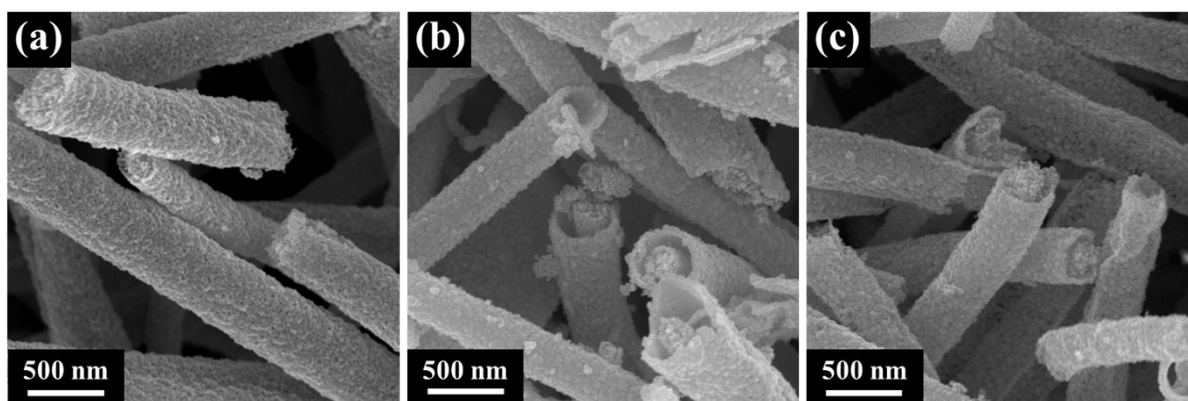

**Fig. S1** SEM images of; (a) SnO<sub>2</sub> NFs, (b) SnO<sub>2</sub> FITs, and (c) NiO-SnO<sub>2</sub> FITs.

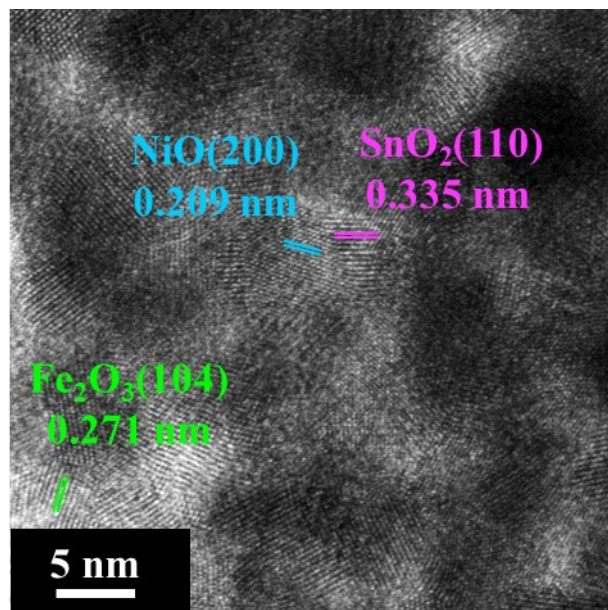

**Fig. S2** HRTEM image of NiO/Fe<sub>2</sub>O<sub>3</sub>-SnO<sub>2</sub> FITs.

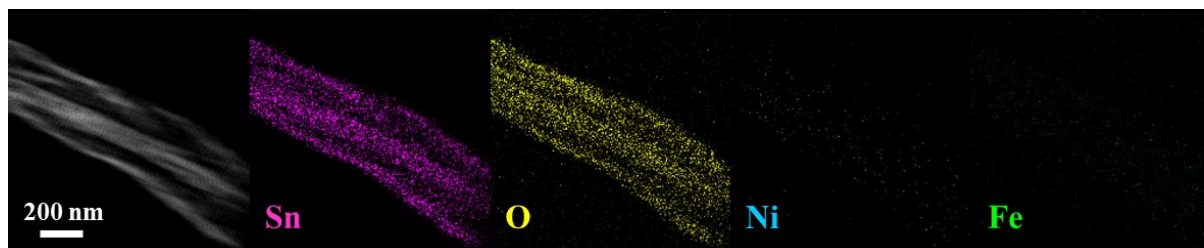

**Fig. S3** EDS elemental mapping images of SnO<sub>2</sub> FITs

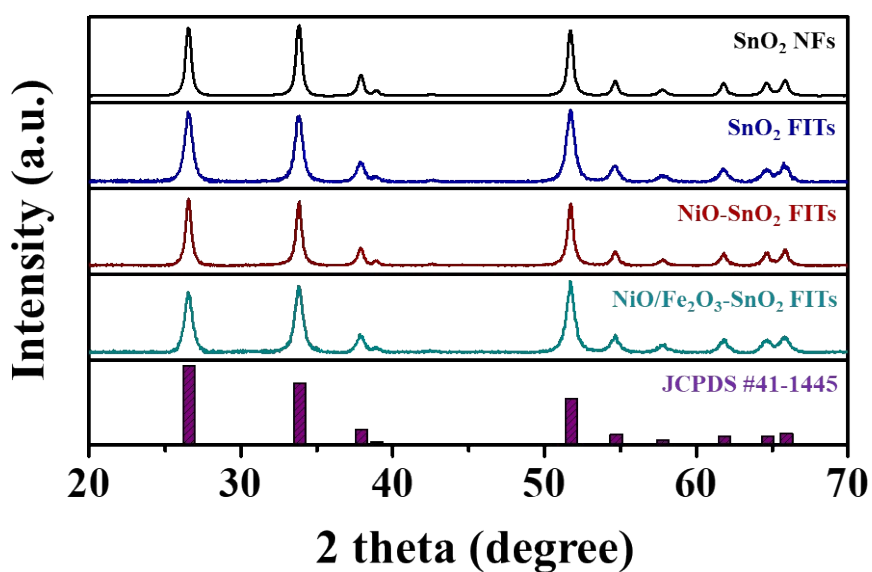

**Fig. S4** XRD analysis of SnO<sub>2</sub> NFs, SnO<sub>2</sub> FITs, NiO-SnO<sub>2</sub> FITs, and NiO/Fe<sub>2</sub>O<sub>3</sub>-SnO<sub>2</sub> FITs.

All samples were polycrystalline rutile SnO<sub>2</sub> (JCPDS no. 41-1445). However, the characteristic peaks of NiO and Fe<sub>2</sub>O<sub>3</sub> were not observed in the XRD analysis, and we suppose, it is due to small amounts of NiO and Fe<sub>2</sub>O<sub>3</sub>.



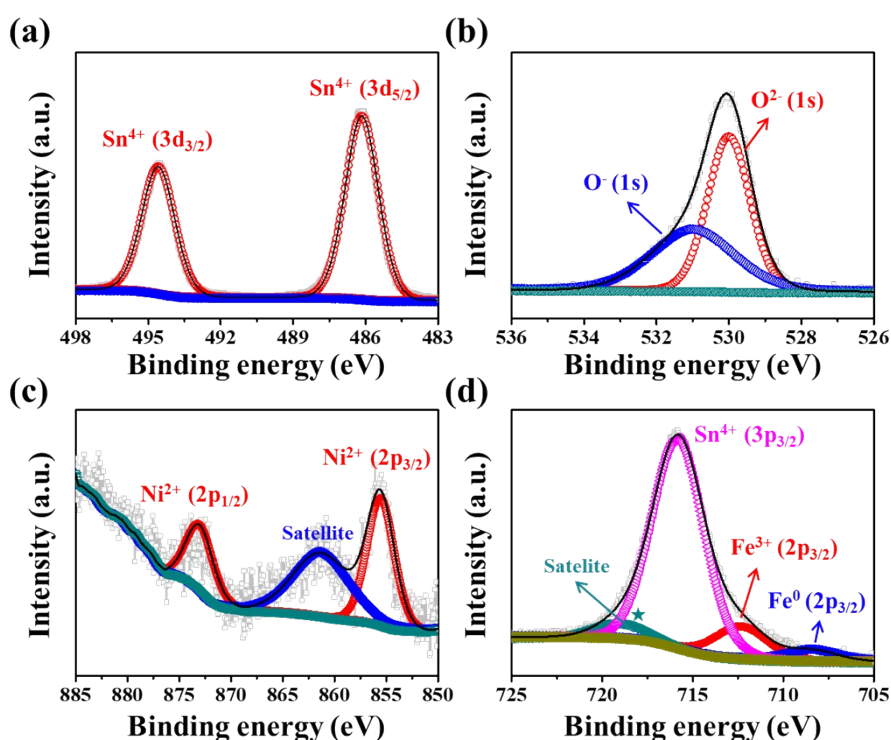

**Fig. S5** XPS spectra of NiO/Fe<sub>2</sub>O<sub>3</sub>-SnO<sub>2</sub> FITs: (a) Sn 3d, (b) O 1s, (c) Ni 2p, and (d) Fe 2p.

For Sn 3d spectrum, we confirmed two obvious peaks of Sn 3d<sub>5/2</sub> and 3d<sub>3/2</sub>, which were located at 486.2 and 494.7 eV, respectively (Fig. S5a).<sup>1</sup> In the case of the O 1s XPS spectrum, we identified chemisorbed oxygen (O<sup>-</sup>) and lattice oxygen species (O<sup>2-</sup>) located at 530.1 and 531.0 eV, respectively (Fig. S5b).<sup>2</sup> For Ni 2p XPS spectrum, two peaks were observed at 855.6 and 873.2 eV, which corresponded to Ni 2p<sub>3/2</sub> and Ni 2p<sub>1/2</sub> peaks of the Ni<sup>2+</sup> state (Fig. S5c).<sup>3</sup> The Fe 2p XPS spectrum showed two peaks at 708.2 and 712.4 eV, corresponding to Fe 2p<sub>3/2</sub> of the Fe<sup>0</sup> state and Fe 2p<sub>3/2</sub> of the Fe<sup>3+</sup> state, respectively (Fig. S5d), with Fe<sup>3+</sup> existing as the dominant state.<sup>4, 5</sup> These results confirmed that Ni and Fe nanoparticles oxidized to NiO and Fe<sub>2</sub>O<sub>3</sub> during calcination in air.

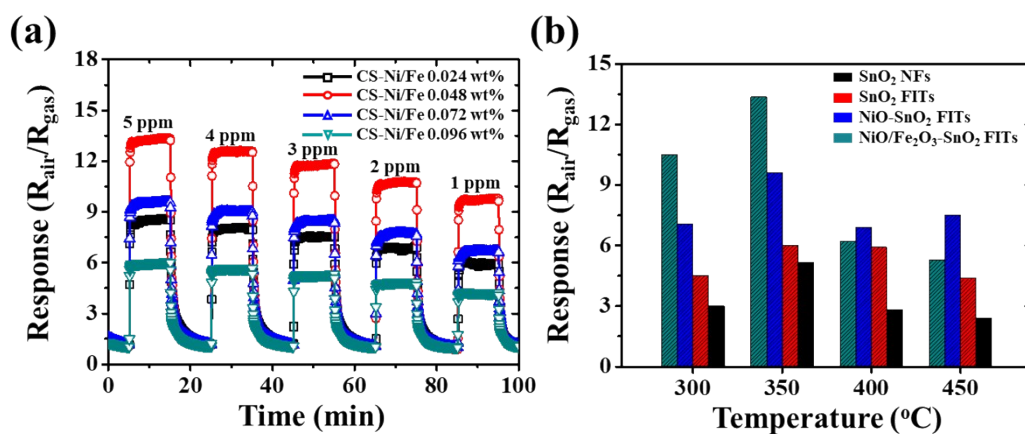

**Fig. S6** (a) Dynamic formaldehyde sensing performance of NiO/Fe<sub>2</sub>O<sub>3</sub>-SnO<sub>2</sub> FITs with Ni/Fe in the range of 0.024–0.096 wt% at 350 °C. (b) Response of SnO<sub>2</sub> NFs, SnO<sub>2</sub> FITs, NiO-SnO<sub>2</sub> FITs, and NiO/Fe<sub>2</sub>O<sub>3</sub>-SnO<sub>2</sub> FITs toward 5 ppm of formaldehyde at different temperatures (300–450 °C).

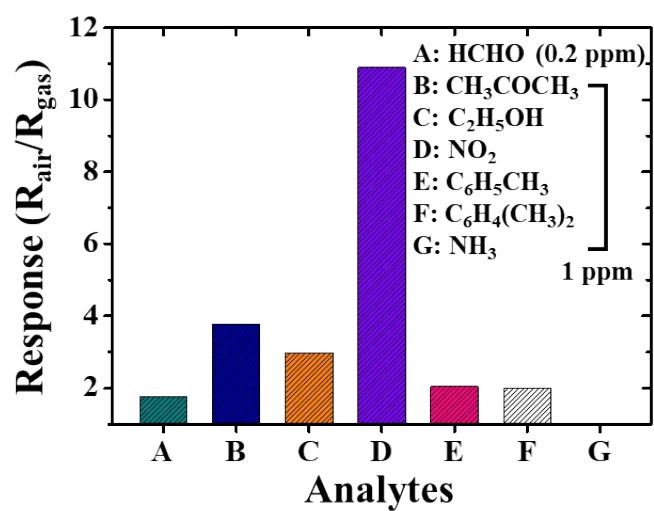

**Fig. S7** HCHO selective sensing property of SnO<sub>2</sub> FITs against CH<sub>3</sub>COCH<sub>3</sub>, C<sub>2</sub>H<sub>5</sub>OH, NO<sub>2</sub>, C<sub>6</sub>H<sub>5</sub>CH<sub>3</sub>, C<sub>6</sub>H<sub>4</sub>(CH<sub>3</sub>)<sub>2</sub>, and NH<sub>3</sub>.

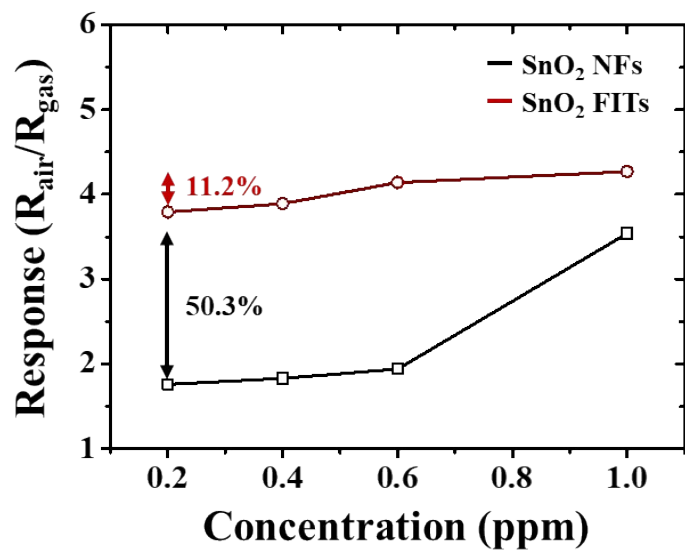

**Fig. S8** Response variation of SnO<sub>2</sub> NFs and SnO<sub>2</sub> FITs in the concentration range of 0.2–1 ppm of formaldehyde gas.

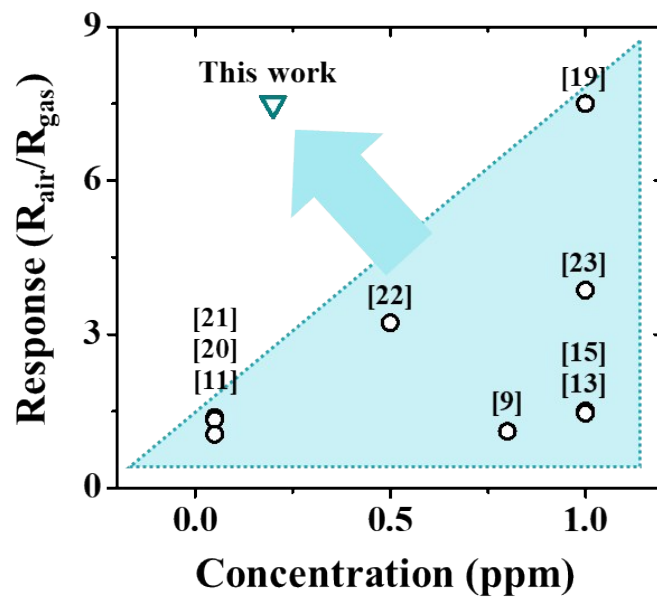

**Fig. S9** 0.05–1 ppm formaldehyde gas response ( $R_{\text{air}}/R_{\text{gas}}$ ) of recently reported SMOs based sensors and the sensor reported in this work.

**Table. S1** ICP-OES test results of NiO/Fe<sub>2</sub>O<sub>3</sub>-SnO<sub>2</sub> FITs (0.096 wt% Ni/Fe)

| <b>Test subject</b> | <b>Unit</b> | <b>Measurement results</b> |
|---------------------|-------------|----------------------------|
| Fe                  | mg/kg       | 586                        |
| Ni                  | mg/kg       | 268                        |
| SnO <sub>2</sub>    | %           | > 99.8                     |

**Table. S2** Sensing properties of recently reported SMOs-based formaldehyde sensors.

| Sensing material                                                    | Response ( $R_{air}/R_{gas}$ ) | Detection limit | Operating temperature | Response time        | Ref.      |
|---------------------------------------------------------------------|--------------------------------|-----------------|-----------------------|----------------------|-----------|
| LSCM@SnO <sub>2</sub> FITs                                          | 26.5 at 5 ppm                  | 80 ppb          | 400 °C                | 32 s at 1 ppm        | 6         |
| Ag-loaded sunflower-like In <sub>2</sub> O <sub>3</sub>             | 1.5 at 5 ppm                   | 5 ppm           | 240 °C                | 0.9 s at 20 ppm      | 7         |
| Ag@LaFeO <sub>3</sub> nanofibers                                    | 4.80 at 5 ppm                  | 5 ppm           | 230 °C                | 2 s at 20 ppm        | 8         |
| CuO nanocubes                                                       | 1.105 at 800 ppb               | –               | 300 °C                | 45 s at 800 ppb      | 9         |
| CuO@TiO <sub>2</sub> nanofibers                                     | 15.5 at 50 ppm                 | 5 ppm           | 200 °C                | 1.4 s at 10 ppm      | 10        |
| Pd-SnO <sub>2</sub> fibers                                          | 1.335 at 50 ppb                | 50 ppb          | 140 °C                | 53 s at 100 ppb      | 11        |
| WO <sub>x</sub> @In <sub>2</sub> O <sub>3</sub> nanosheets          | 25 at 100 ppm                  | 0.1 ppm         | 170 °C                | 1 s at 100 ppm       | 12        |
| In <sub>2</sub> O <sub>3</sub> nanoparticle-flowerlike ZnO          | 1.5 at 1 ppm                   | 1 ppm           | 240 °C                | 1.5 s at 50 ppm      | 13        |
| Hierarchical ZnO architectures                                      | 35 at 100 ppm                  | –               | 260 °C                | 1 s at 100 ppm       | 14        |
| $\alpha$ -Fe <sub>2</sub> O <sub>3</sub> @NiO core-shell nanofibers | 1.46 at 1 ppm                  | < 1 ppm         | 240 °C                | 2 s at 50 ppm        | 15        |
| Ce@Sn <sub>3</sub> O <sub>4</sub> hierarchical microspheres         | 5.50 at 100 ppm                | –               | 200 °C                | 4 s at 200 ppm       | 16        |
| SnO <sub>2</sub> microtubes                                         | 26.2 at 100 ppm                | 10 ppb          | 92 °C                 | 4–200 s at 1–100 ppm | 17        |
| SnO <sub>2</sub> microspheres                                       | 38.28 at 100 ppm               | –               | 200 °C                | 17 s at 100 ppm      | 18        |
| Co-rich ZnCo <sub>2</sub> O <sub>4</sub> hollow nanospheres         | 7.5 at 1 ppm                   | 13 ppb          | 230 °C                | 149 s at 1 ppm       | 19        |
| Single-crystalline Co <sub>3</sub> O <sub>4</sub> nanoparticles     | 1.05 at 50 ppb                 | 50 ppb          | 220 °C                | 75 s at 3 ppm        | 20        |
| Hierarchical flower-like CuO nanostructure                          | 1.378 at 50 ppb                | 50 ppb          | 250 °C                | –                    | 21        |
| NiO nanoroses                                                       | 3.22 at 500 ppb                | 50 ppb          | 230 °C                | 58.5 s at 500 ppb    | 22        |
| Hierarchical porous SnO <sub>2</sub> micro-rods                     | 3.86 at 1 ppm                  | 50 ppb          | 330 °C                | 4.3 s at 1 ppm       | 23        |
| NiO/Fe <sub>2</sub> O <sub>3</sub> -SnO <sub>2</sub> FITs           | 7.44 at 200 ppb                | < 5 ppb         | 350 °C                | 12 s at 200 ppb      | this work |

## References

- 1 Y. Cui, G. Wang and D. Pan, *CrystEngComm*, 2013, **15**, 10459–10463.
- 2 J. S. Jang, Y. W. Lim, D. H. Kim, D. Lee, W. T. Koo, H. Lee, B. S. Bae and I. D. Kim, *Small*, 2018, 1802260.
- 3 W. Lu, X. Qin, A. M. Asiri, A. O. Al-Youbi and X. Sun, *Analyst*, 2013, **138**, 429–433.
- 4 H. Lv, H. Zhao, T. Cao, L. Qian, Y. Wang and G. Zhao, *J. Mol. Catal. A: Chem.*, 2015, **400**, 81–89.
- 5 R. Liang, L. Shen, F. Jing, N. Qin and L. Wu, *ACS Appl. Mater. Interfaces*, 2015, **7**, 9507–9515.
- 6 J.-Y. Kang, J.-S. Jang, W.-T. Koo, J. Seo, Y. Choi, M.-H. Kim, D.-H. Kim, H.-J. Cho, W. Jung and I.-D. Kim, *J. Mater. Chem. A*, 2018, **6**, 10543–10551.
- 7 S. Wang, B. Xiao, T. Yang, P. Wang, C. Xiao, Z. Li, R. Zhao and M. Zhang, *J. Mater. Chem. A*, 2014, **2**, 6598–6604.
- 8 W. Wei, S. Guo, C. Chen, L. Sun, Y. Chen, W. Guo and S. Ruan, *J. Alloys Compd.*, 2017, **695**, 1122–1127.
- 9 H. J. Park, N.-J. Choi, H. Kang, M. Y. Jung, J. W. Park, K. H. Park and D.-S. Lee, *Sens. Actuators, B*, 2014, **203**, 282–288.
- 10 J. Deng, L. Wang, Z. Lou and T. Zhang, *J. Mater. Chem. A*, 2014, **2**, 9030–9034.
- 11 S. Tian, X. Ding, D. Zeng, J. Wu, S. Zhang and C. Xie, *RSC Adv.*, 2013, **3**, 11823–11831.
- 12 Y. Cao, Y. He, X. Zou and G.-D. Li, *Sens. Actuators, B*, 2017, **252**, 232–238.
- 13 S. Wang, Z. Li, P. Wang, C. Xiao, R. Zhao, B. Xiao, T. Yang and M. Zhang, *CrystEngComm*, 2014, **16**, 5716–5723.
- 14 J. Cao, S. Wang and H. Zhang, *Mater. Lett.*, 2017, **202**, 44–47.
- 15 J. Cao, Z. Wang, R. Wang, S. Liu, T. Fei, L. Wang and T. Zhang, *J. Mater. Chem. A*, 2015, **3**, 5635–5641.
- 16 X. Ma, J. Shen, D. Hu, L. Sun, Y. Chen, M. Liu, C. Li and S. Ruan, *J. Alloys Compd.*, 2017, **726**, 1092–1100.
- 17 W. Zhang, X. Cheng, X. Zhang, Y. Xu, S. Gao, H. Zhao and L. Huo, *Sens. Actuators, B*, 2017, **247**, 664–672.
- 18 Y. Li, N. Chen, D. Deng, X. Xing, X. Xiao and Y. Wang, *Sens. Actuators, B*, 2017, **238**, 264–273.
- 19 H. J. Park, J. Kim, N.-J. Choi, H. Song and D.-S. Lee, *ACS Appl. Mater. Interfaces*, 2016, **8**, 3233–3240.



- 20 J. Y. Kim, N.-J. Choi, H. J. Park, J. Kim, D.-S. Lee and H. Song, *J. Phys. Chem. C*, 2014, **118**, 25994–26002.
- 21 H. Deng, H.-r. Li, F. Wang, C.-x. Yuan, S. Liu, P. Wang, L.-z. Xie, Y.-z. Sun and F.-z. Chang, *J. Mater. Sci.: Mater. Electron.*, 2016, **27**, 6766–6772.
- 22 Y. Zhang, L.-Z. Xie, C.-X. Yuan, C.-L. Zhang, S. Liu, Y.-Q. Peng, H.-R. Li and M. Zhang, *Nano*, 2016, **11**, 1650009.
- 23 K. Xu, D. Zeng, S. Tian, S. Zhang and C. Xie, *Sens. Actuators, B*, 2014, **190**, 585–592.
